# Supplementary material for: Valence shell electronic spectroscopy of isoprene studied by theoretical calculations and by electron scattering, photoelectron, and absolute photoabsorption measurements
Source: Royal Society of Chemistry journal article supplement (doi:10.1039/b916620c), 2009-01-01
Supplement: b916620c.pdf [file b916620c.pdf]

**Supplementary data**

Figure 9 – Highest Occupied Molecular Orbital (HOMO) of isoprene

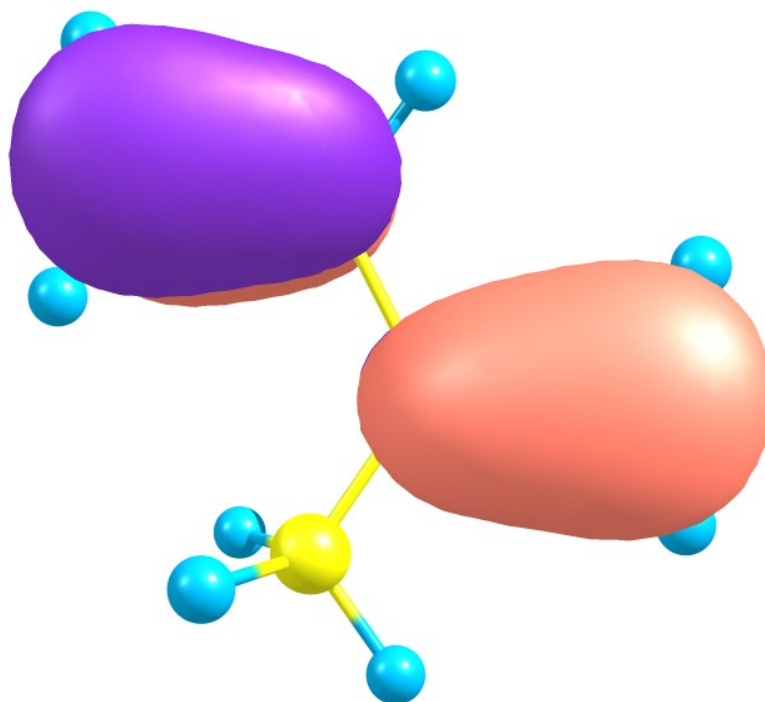

Figure 10 – The Second Highest Occupied Molecular Orbital (SHOMO) of isoprene

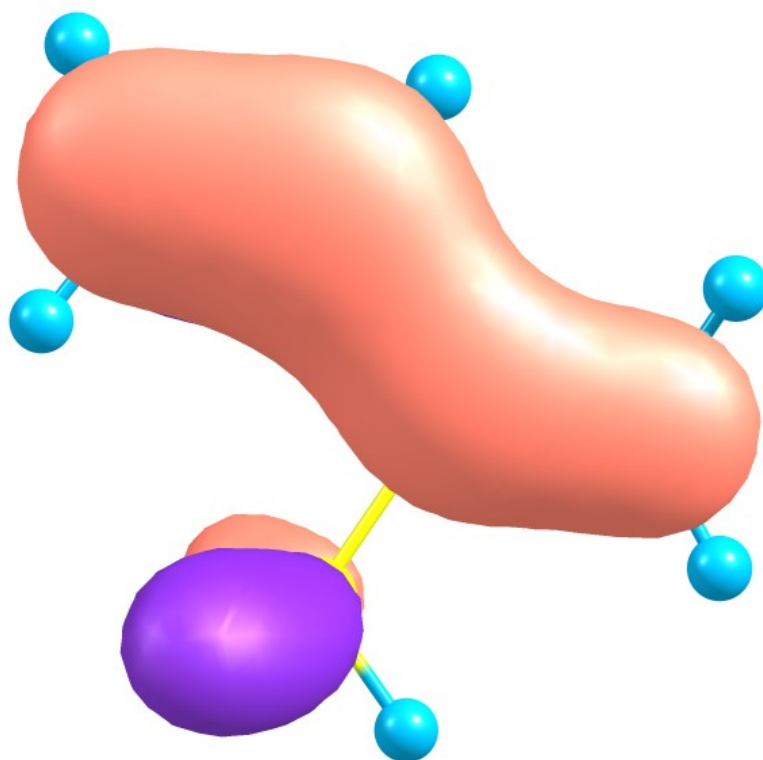

Figure 11 – The Lowest Unoccupied Molecular Orbitals (LUMO) of isoprene

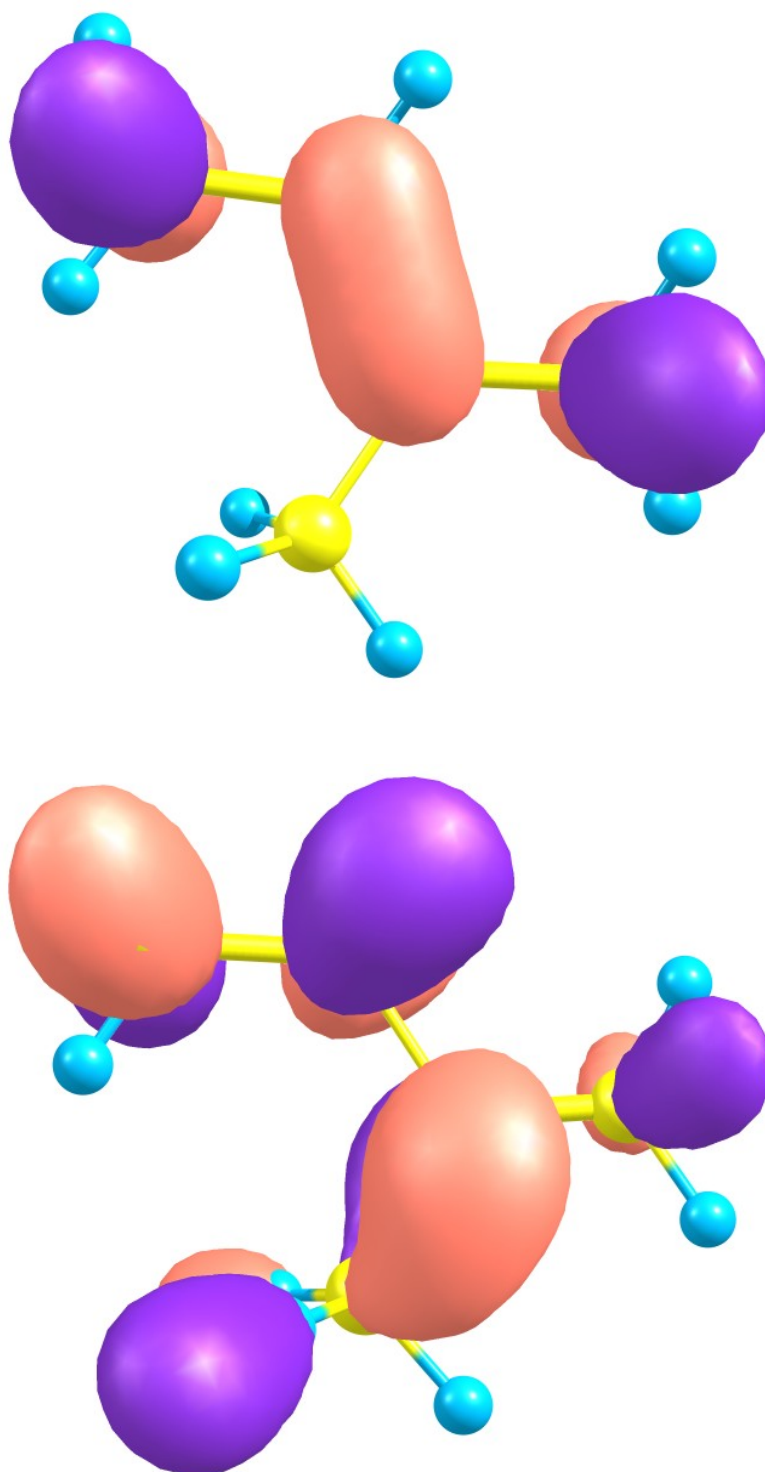

Figure 12 – CC stretching of neutral isoprene and CCC deformation of ionic isoprene

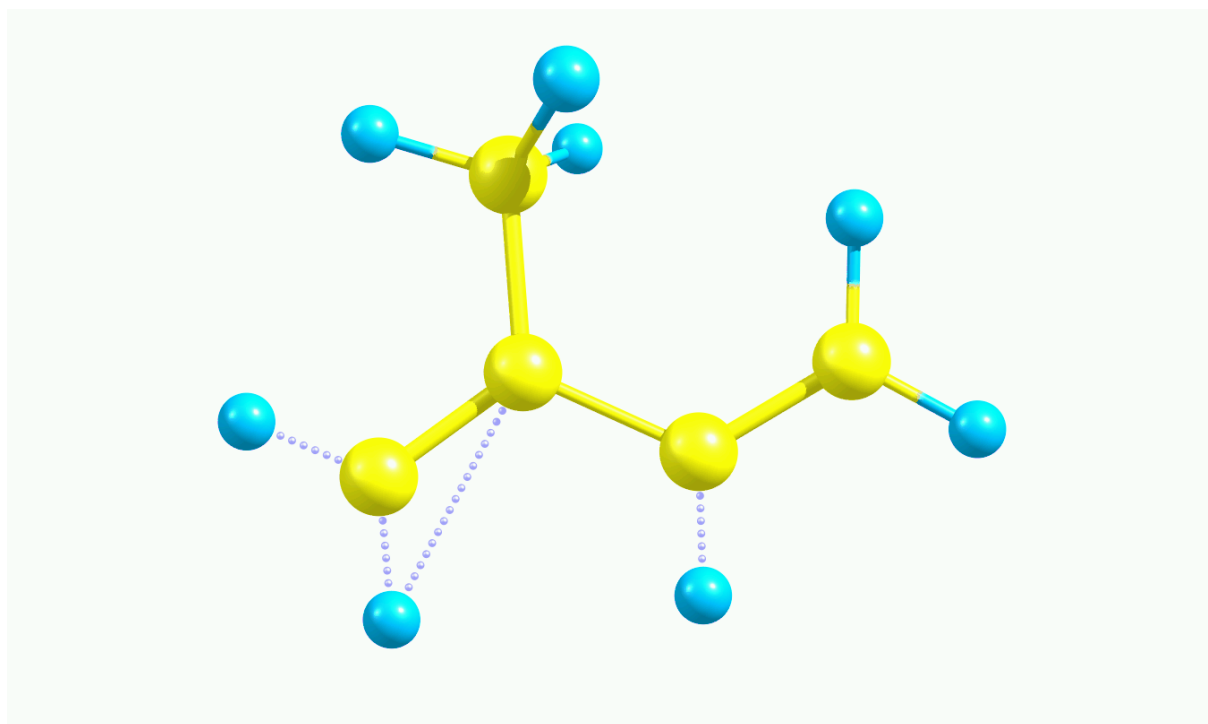

Neutral isoprene

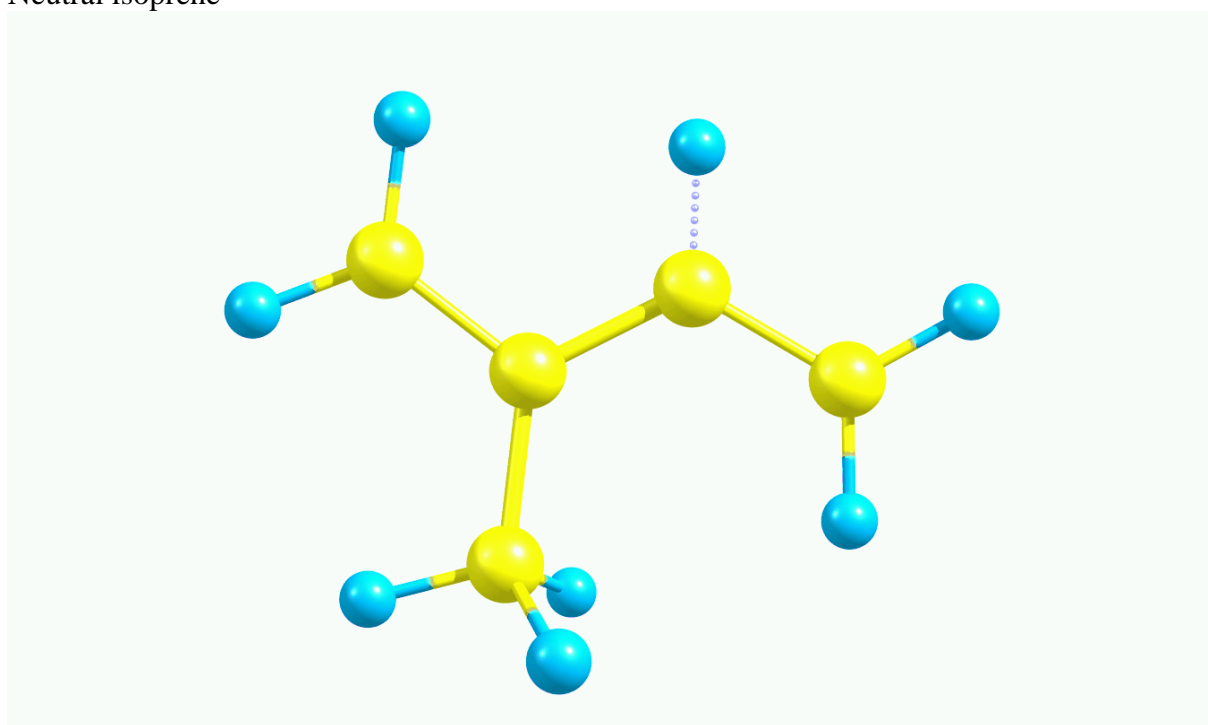

Ionic isoprene

Table 8 – Experimental photoabsorption cross section for the isoprene molecule, as determined by the electron impact method (9 – 28 eV)

| Energy (eV) | Cross Section (Mb) |
|-------------|--------------------|
| 9.0         | 41.5               |
| 9.2         | 44.3               |
| 9.4         | 46.7               |
| 9.6         | 48.5               |
| 9.8         | 50.0               |
| 10.0        | 53.3               |
| 10.2        | 55.6               |
| 10.4        | 56.9               |
| 10.6        | 59.0               |
| 10.8        | 61.4               |
| 11.0        | 63.3               |
| 11.2        | 65.4               |
| 11.4        | 66.1               |
| 11.6        | 67.9               |
| 11.8        | 70.4               |
| 12.0        | 72.4               |
| 12.2        | 75.8               |
| 12.4        | 76.5               |
| 12.6        | 80.1               |
| 12.8        | 82.3               |
| 13.0        | 84.6               |
| 13.2        | 86.1               |
| 13.4        | 88.1               |
| 13.6        | 90.9               |
| 13.8        | 94.6               |
| 14.0        | 98.3               |
| 14.2        | 97.8               |
| 14.4        | 99.6               |
| 14.6        | 102.4              |
| 14.8        | 102.6              |
| 15.0        | 104.0              |
| 15.2        | 106.7              |
| 15.4        | 108.7              |
| 15.6        | 109.2              |
| 15.8        | 109.2              |
| 16.0        | 113.1              |
| 16.2        | 112.8              |
| 16.4        | 112.7              |
| 16.6        | 117.5              |
| 16.8        | 114.7              |
| 17.0        | 117.2              |
| 17.2        | 117.3              |
| 17.4        | 118.5              |
| 17.6        | 118.0              |
| 17.8        | 115.9              |
| 18.0        | 116.6              |
| 18.2        | 118.9              |
| 18.4        | 118.4              |

| Energy (eV) | Cross Section (Mb) |
|-------------|--------------------|
| 18.6        | 118.2              |
| 18.8        | 116.5              |
| 19.0        | 117.4              |
| 19.2        | 116.1              |
| 19.4        | 118.3              |
| 19.6        | 118.7              |
| 19.8        | 116.3              |
| 20.0        | 119.8              |
| 20.2        | 116.4              |
| 20.4        | 117.3              |
| 20.6        | 117.0              |
| 20.8        | 118.3              |
| 21.0        | 115.8              |
| 21.2        | 117.4              |
| 21.4        | 116.1              |
| 21.6        | 114.8              |
| 21.8        | 116.8              |
| 22.0        | 113.6              |
| 22.2        | 115.2              |
| 22.4        | 114.0              |
| 22.6        | 112.3              |
| 22.8        | 110.2              |
| 23.0        | 112.0              |
| 23.2        | 109.5              |
| 23.4        | 110.4              |
| 23.6        | 107.9              |
| 23.8        | 106.8              |
| 24.0        | 105.5              |
| 24.2        | 105.4              |
| 24.4        | 106.6              |
| 24.6        | 103.9              |
| 24.8        | 102.5              |
| 25.0        | 103.4              |
| 25.2        | 100.0              |
| 25.4        | 100.8              |
| 25.6        | 99.8               |
| 25.8        | 97.9               |
| 26.0        | 98.2               |
| 26.2        | 97.2               |
| 26.4        | 97.7               |
| 26.6        | 98.1               |
| 26.8        | 96.3               |
| 27.0        | 95.1               |
| 27.2        | 94.1               |
| 27.4        | 94.4               |
| 27.6        | 92.6               |
| 27.8        | 93.3               |
| 28.0        | 89.6               |
